# Supplementary material for: Systematic barcoding of 12 major medicinal herbs in the Apiaceae family
Source: Research Square preprint supplement (doi:10.21203/rs.3.rs-8241605/v1), 2025-12-11
Supplement: Supplementary file 1 [file 80a1379343fb5d4fec1716f9.docx]

**Supplementary Information**

**Table S1** Information on the 45S nrDNA sequences from 12 assembled Apiaceae species.

| **Species** | **Length**  **(bp)** | **18s**  **(bp)** | **ITS1**  **(bp)** | **5.8s**  **(bp)** | **ITS2**  **(bp)** | **26s**  **(bp)** |
| --- | --- | --- | --- | --- | --- | --- |
| ***Ag*** | 5,812 | 1,809 | 216 | 164 | 224 | 3,399 |
| ***Ar*** | 5,806 | 1,809 | 214 | 163 | 231 | 3,389 |
| ***Gl**** | 5,812 | 1,809 | 215 | 163 | 231 | 3,394 |
| ***Ad*** | 5,813 | 1,809 | 213 | 164 | 227 | 3,400 |
| ***Aj*** | 5,805 | 1,809 | 215 | 162 | 231 | 3,388 |
| ***Ls***† | 5,815 | 1,809 | 216 | 163 | 233 | 3,394 |
| ***Pj***‡ | 5,815 | 1,809 | 216 | 163 | 233 | 3,394 |
| ***Ct*** | 5,806 | 1,809 | 215 | 163 | 231 | 3,388 |
| ***Co*** | 5,806 | 1,809 | 215 | 163 | 231 | 3,388 |
| ***Lo*** | 5,807 | 1,809 | 215 | 163 | 232 | 3,388 |
| ***As*** | 5,806 | 1,809 | 217 | 163 | 233 | 3,384 |
| ***Bk*** | 5,806 | 1,809 | 245 | 156 | 235 | 3,361 |

* : KX757778.1, † : KX757775.1, ‡ : KX757777.1


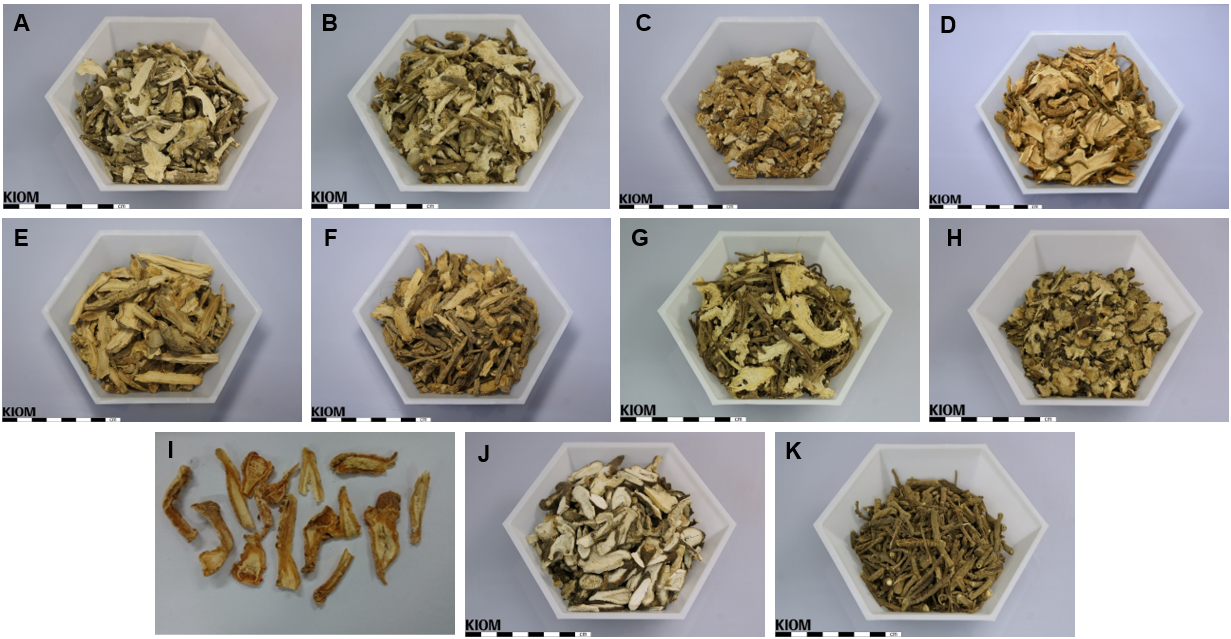


**Figure S1** Dried root morphology of 12 medicinal plants in the Apiaceae family**.** **A.** *Angelica gigas*. **B.** *Angelica reflexa.* **C.** *Glehnia littoralis.* **D.** *Angelica dahurica.* **E.** *Ledebouriella seseloides*. **F.** *Peucedanum japonicum*. **G.** *Conioselinum tenuissimum*. **H.** *Cnidium officinale*. **I.** *Levisticum officinale*. **J.** *Anthriscus sylvestris*. **K.** *Bupleurum komarovianum*. This image was provided by the Korean Medicine Research Institute (https://oasis.kiom.re.kr/herblib/hminfo/mdhrpt/mdhrptList.do).

**A**


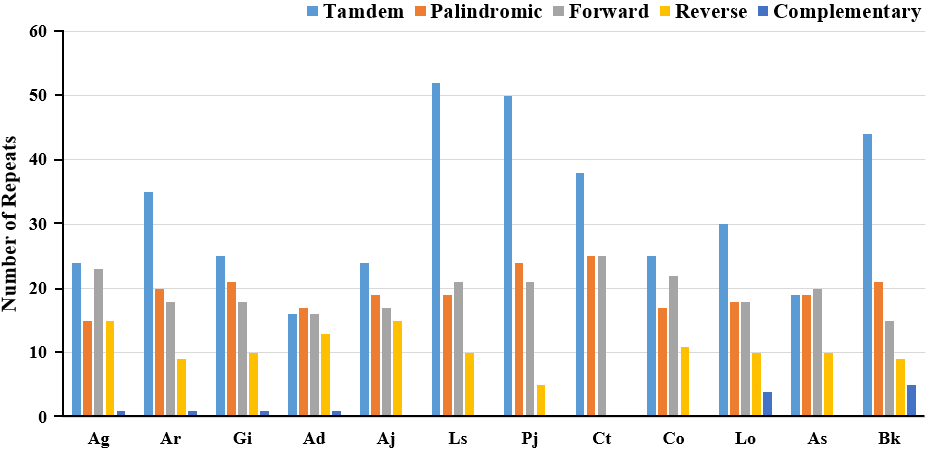


**B**


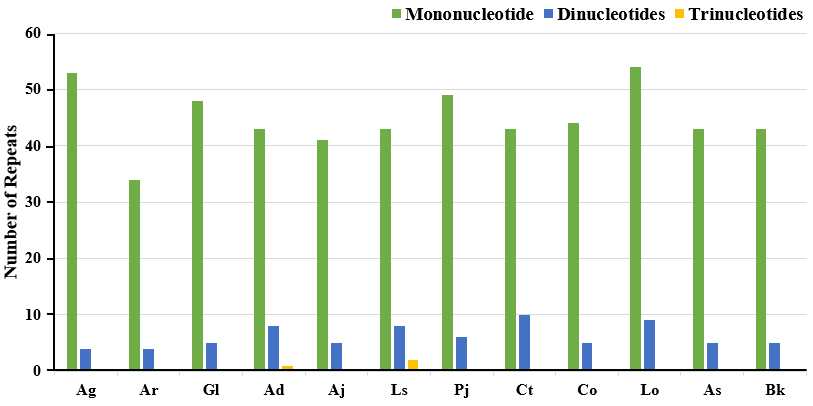


**Figure S2** Repeat structure and SSR sequences in the plastomes of 12 Apiaceae species. **A.** Distribution of repeat types in 12 Apiaceaespecies. The bar graph displays the counts of different repeat types (tandem, palindromic, forward, reverse, and complementary) in the 12 Apiaceaespecies. **B.** Types and abundance of simple sequence repeats (SSRs) detected in the plastomes of the 12 Apiaceae species.


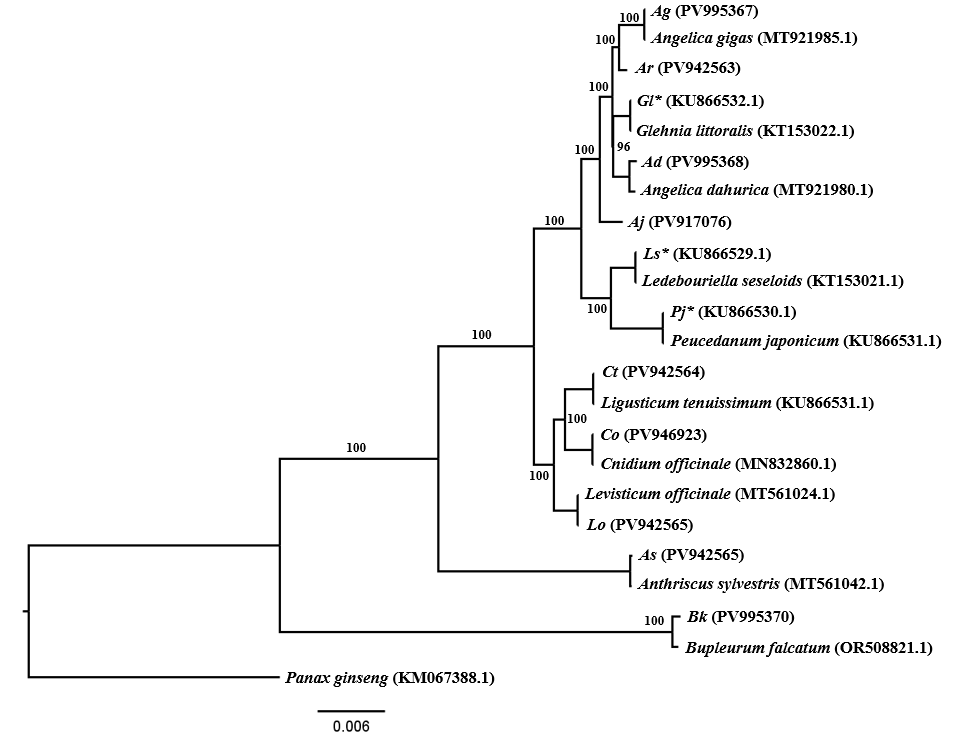


**Figure S3** Maximum-likelihood phylogenetic tree of 12 Apiaceae species inferred from complete plastome sequences. The tree was constructed using RAxML [44]with 1000 bootstrap replicates under the GTRGAMMA substitution model. Bootstrap values greater than 50% are shown above the branches. *Panax ginseng* (KM067588.1) was used as the outgroup. Among the 12 plastomes, nine were newly assembled in this study. The other three, previously assembled by our laboratory, are indicated by an asterisk.
